# Supplementary material for: Structural characterization and in vitro antitumor activity of polysaccharides from Zizyphus jujuba cv. Muzao
Source: Royal Society of Chemistry journal article supplement (doi:10.1039/c4ra13350a), 2015-01-01
Supplement: c4ra13350a1.pdf [file c4ra13350a1.pdf]

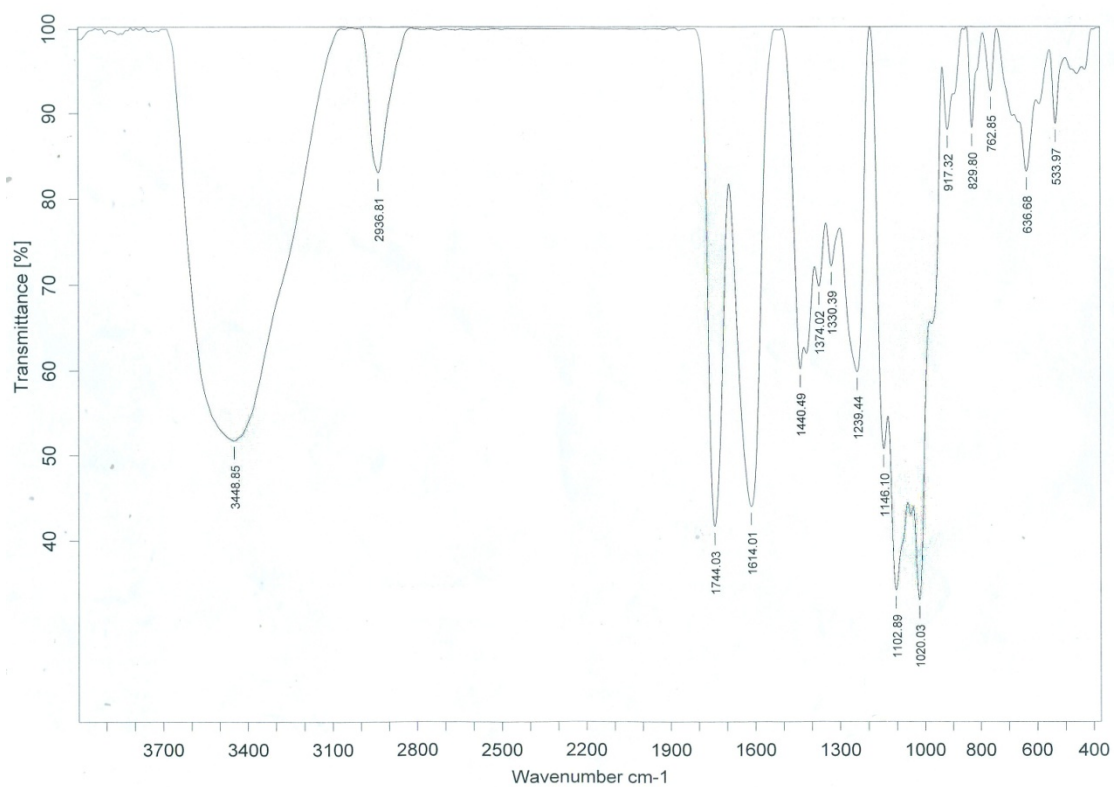

IR spectrum of HJP1

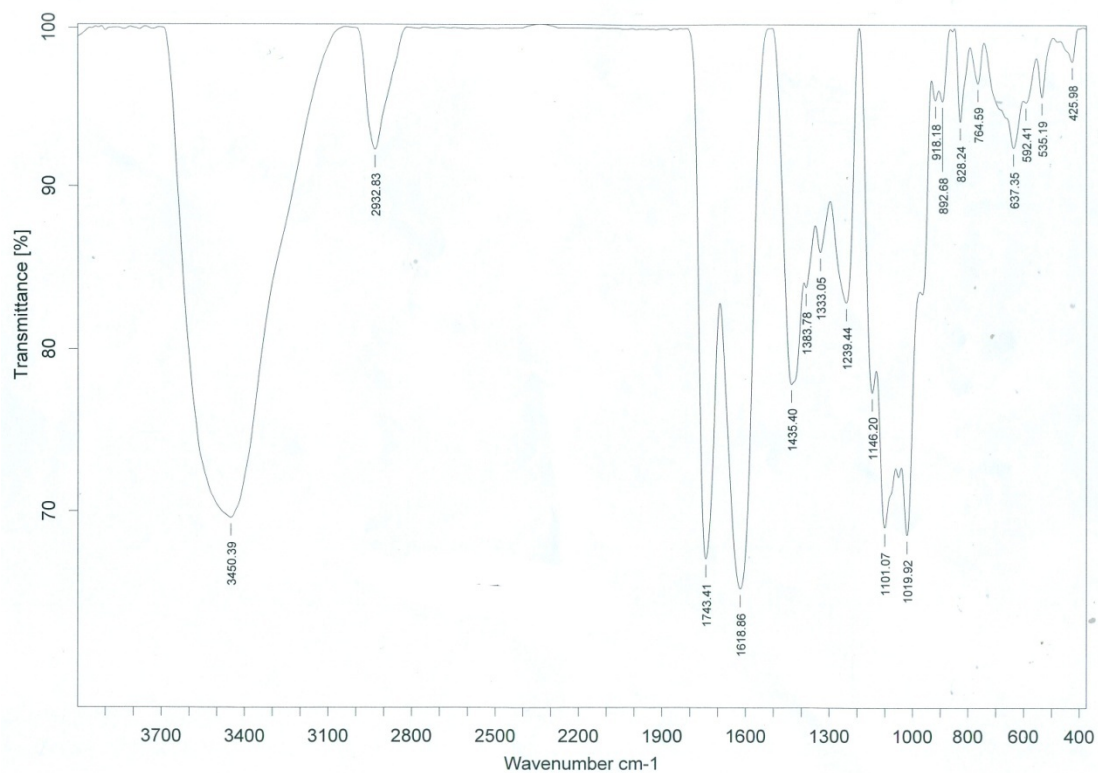

IR spectrum of HJP3

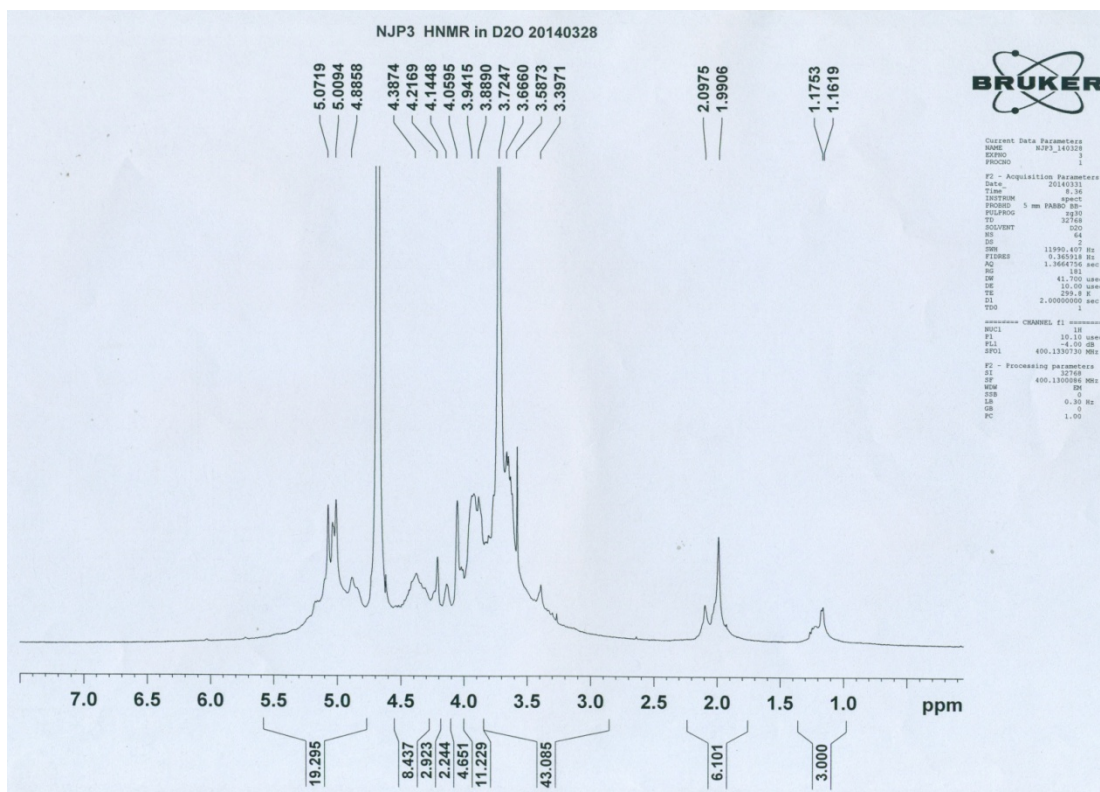

$^1\text{H}$  NMR spectrum of HJP3

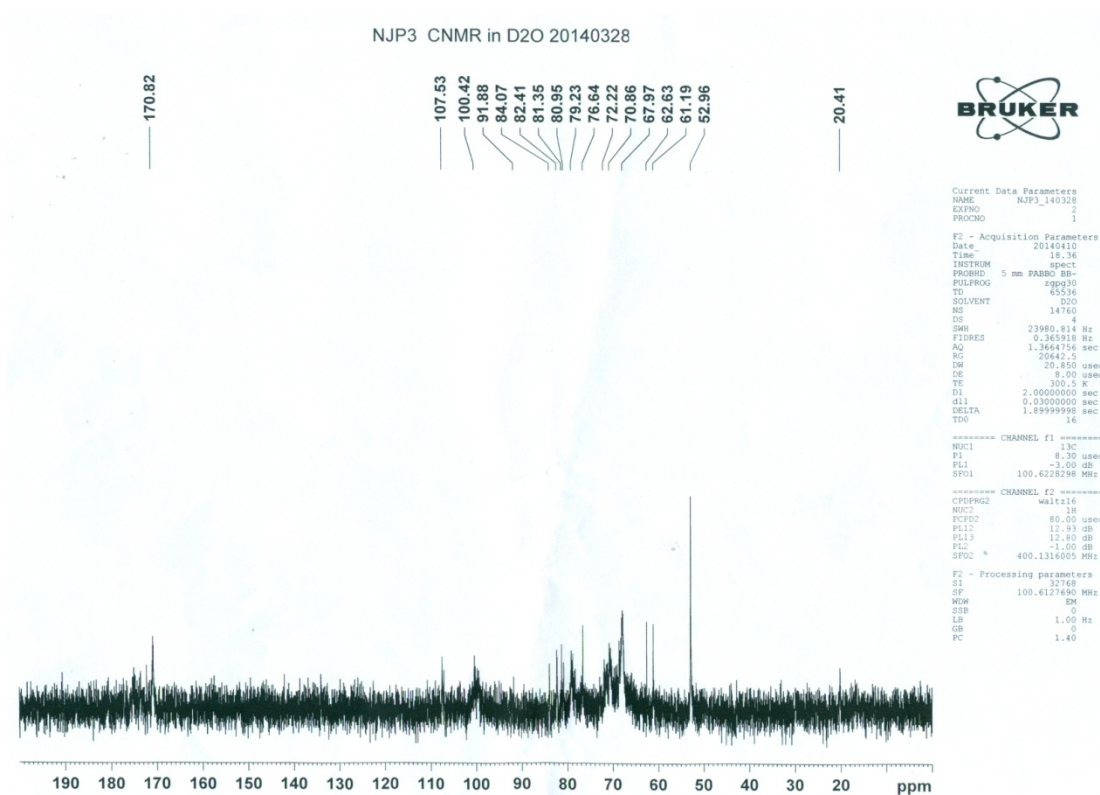

$^{13}\text{C}$  NMR spectrum of HJP3

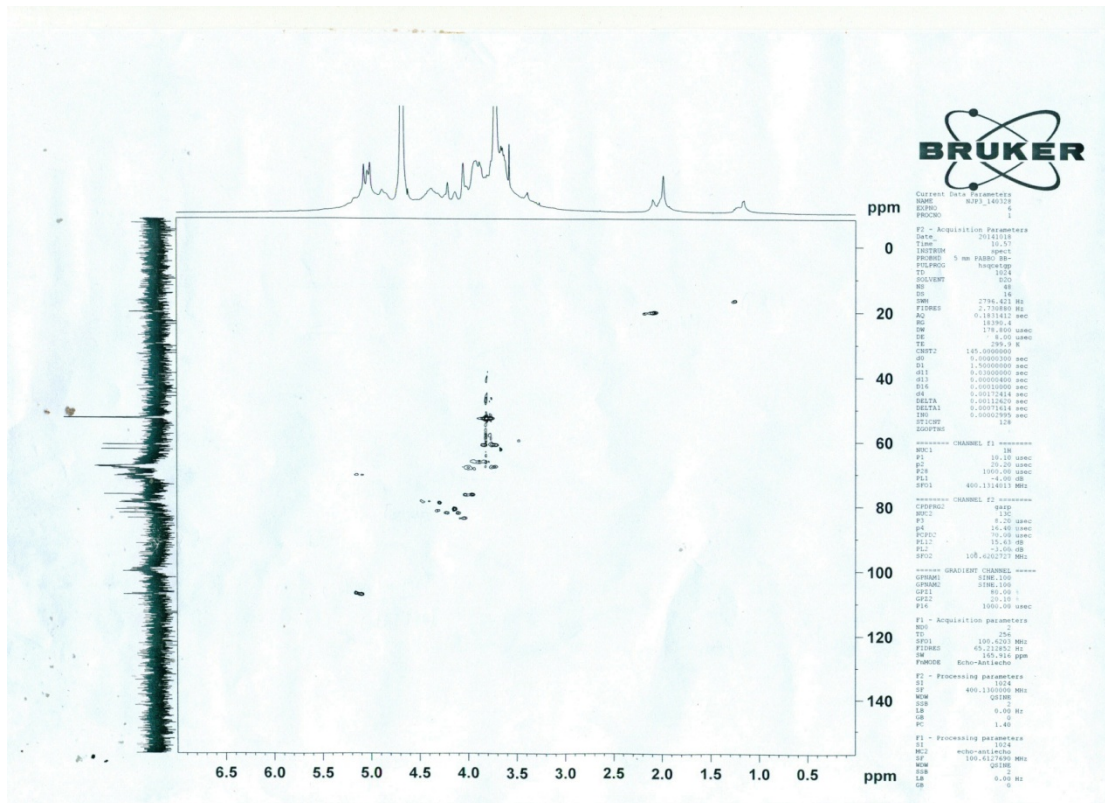

HMQC spectrum of HJP3

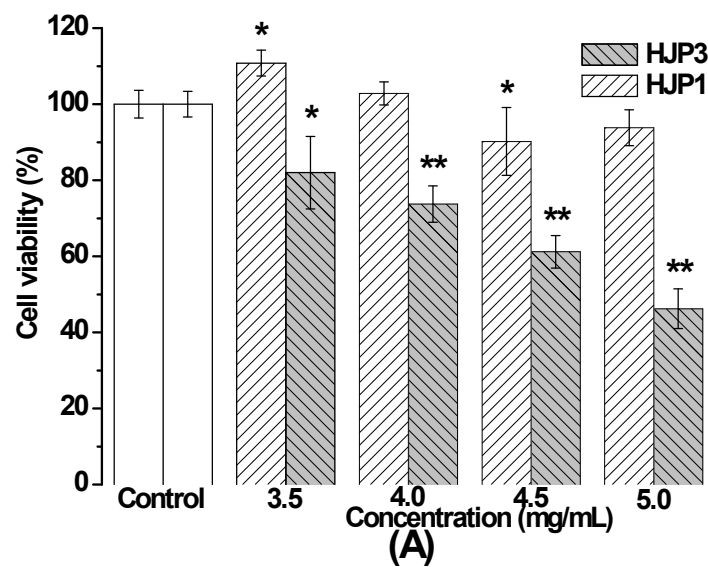

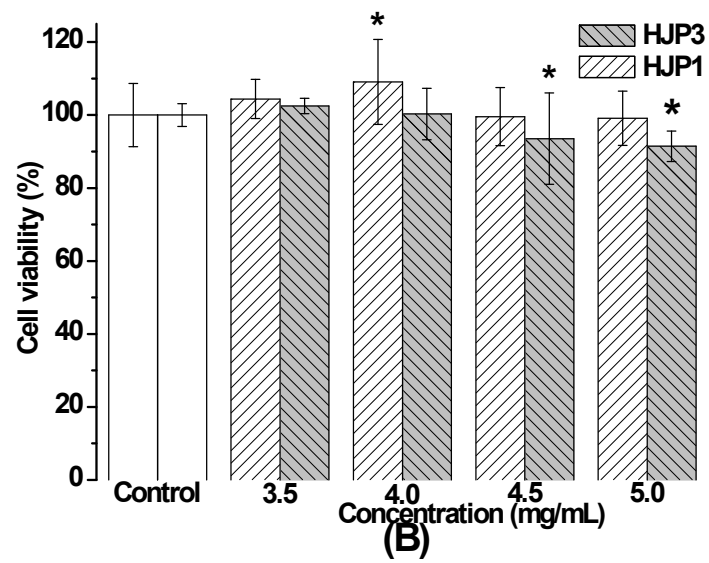

**Fig.3.** Effects of HJP1 and HJP3 at different concentrations on HepG2 cells (A) and normal cells (B) by in vitro MTT assay. (*P*-value relative to control group: \*  $P < 0.05$ ; \*\*  $P < 0.01$ )
